# Supplementary material for: Association of Maternal Microbiota and Diet in Cord Blood Cytokine and Immunoglobulin Profiles
Source: PubMed Central journal article supplement (PMC7916816; doi:10.3390/ijms22041778), 2021-02-10
Supplement: ijms-22-01778-s001.pdf [file ijms-22-01778-s001.pdf]

**Supplementary Table S1.** Immunoglobulin composition on maternal plasma (MP) regarding the maternal enterotype.

| Immunoglobulins | Enterotype I, n = 10 |                 | Enterotype II, n = 9 |                 |
|-----------------|----------------------|-----------------|----------------------|-----------------|
|                 | mg/L                 | %               | mg/L                 | %               |
| <b>Total</b>    | 13207.95 ± 2350.97   | -               | 9683.06 ± 812.32     | -               |
| <b>IgM</b>      | 3968.92 ± 1105.15    | 27.84 ± 4.56    | 2728.42 ± 322.15     | 27.87 ± 1.90    |
| <b>IgG</b>      | 8800.27 ± 1685.73    | 68.46 ± 4.55    | 6530.36 ± 535.74     | 67.70 ± 2.05    |
| <b>IgG1</b>     | 7007.03 ± 1686.61    | 75.03 ± 3.40    | 4750.65 ± 496.19     | 71.71 ± 2.78    |
| <b>IgG2</b>     | 812.50 ± 106.30      | 11.29 ± 2.13    | 797.94 ± 127.92      | 12.32 ± 1.45    |
| <b>IgG3</b>     | 850.29 ± 109.88      | 11.82 ± 1.99    | 856.04 ± 100.30      | 14.04 ± 2.03    |
| <b>IgG4</b>     | 130.44 ± 21.77       | 1.86 ± 0.44     | 125.73 ± 27.46       | 1.92 ± 0.30     |
| <b>Th1</b>      | 8669.83 ± 1686.47    | 98.14 ± 0.44    | 6404.64 ± 522.75     | 98.08 ± 0.30    |
| <b>Th2</b>      | 130.44 ± 21.77       | 1.86 ± 0.44     | 125.73 ± 27.46       | 1.92 ± 0.30     |
| <b>Th1/Th2</b>  | 84.78 ± 19.36        | -               | 62.53 ± 10.29        | -               |
| <b>IgA</b>      | 437.98 ± 49.81       | 3.69 ± 0.33     | 423.48 ± 36.77       | 4.43 ± 0.28     |
| <b>IgE</b>      | 0.78 ± 0.07          | 0.0069 ± 0.0009 | 0.79 ± 0.12          | 0.0083 ± 0.0011 |

Data shown are immunoglobulin concentrations expressed as mean ± SEM and relative frequencies (%). Mann-Whitney U test was used to determine significant differences. \* $p < 0.05$ . MP, maternal plasma; UCP, umbilical cord plasma. IgG1, IgG2 and IgG3 (Igs-associated Th1 response); IgG4 (Ig-associated Th2 response).

**Supplementary table S2.** Cytokine composition on maternal plasma (MP) regarding the maternal enterotype.

| Cytokines     | Enterotype I, n = 9 |             | Enterotype II, n = 9 |             |
|---------------|---------------------|-------------|----------------------|-------------|
|               | pg/mL               | %det        | pg/mL                | %det        |
| GM-CSF        | 4.56 ± 2.46         | 33.33 (3/9) | 0.00 ± 0.00          | 0.00 (0/0)  |
| IFN- $\gamma$ | 13.31 ± 4.20        | 100 (9/9)   | 15.11 ± 3.26         | 100 (9/9)   |
| IL-1 $\beta$  | 0.23 ± 0.22         | 11.11 (1/9) | 0.00 ± 0.00          | 0.00 (0/9)  |
| IL-2          | 2.26 ± 1.24         | 33.33 (3/9) | 1.43 ± 1.00          | 22.22 (2/9) |
| IL-4          | 28.54 ± 24.14       | 22.22 (2/9) | 0.00 ± 0.00          | 0.00 (0/9)  |
| IL-5          | 0.74 ± 0.68         | 33.33 (3/9) | 0.75 ± 0.72          | 44.44 (4/9) |
| IL-6          | 8.26 ± 5.08         | 44.44 (4/9) | 1.56 ± 1.36          | 33.33 (3/9) |
| IL-9          | 4.75 ± 3.06         | 44.44 (4/9) | 1.43 ± 1.30          | 22.22 (2/9) |
| IL-10         | 0.02 ± 0.02         | 11.11 (1/9) | 0.00 ± 0.00          | 0.00 (0/9)  |
| IL-12         | 0.18 ± 0.07         | 55.56 (5/9) | 0.31 ± 0.21          | 55.56 (5/9) |
| IL-13         | 4.09 ± 1.92         | 44.44 (4/9) | 2.20 ± 2.20          | 11.11 (1/9) |
| IL-17         | 2.59 ± 2.45         | 11.11 (1/9) | 0.00 ± 0.00          | 0.00 (0/9)  |
| IL-18         | 30.01 ± 5.57        | 100 (9/9)   | 37.62 ± 4.24         | 100 (9/9)   |
| IL-21         | 4.28 ± 1.91         | 44.44 (4/9) | 3.84 ± 1.65          | 55.56 (5/9) |
| IL-22         | 2.20 ± 2.09         | 11.11 (1/9) | 1.77 ± 1.18          | 22.22 (2/9) |
| IL-23         | 22.65 ± 10.00       | 77.78 (7/9) | 23.62 ± 9.96         | 88.89 (8/9) |
| IL-27         | 32.38 ± 26.52       | 22.22 (2/9) | 0.58 ± 0.58          | 11.11 (1/9) |
| TNF- $\alpha$ | 0.05 ± 0.05         | 11.11 (1/9) | 0.02 ± 0.02          | 11.11 (1/9) |

Data shown are cytokine concentrations (pg/mL) expressed as mean  $\pm$  S.E.M. and detectability frequencies (%det). Mann-Whitney U test was used to determine significant differences between plasma samples. Chi-square test compared detectability. \*  $p < 0.05$ . MP, maternal plasma; UCP, umbilical cord plasma; GM-CSF, Granulocyte Macrophage Colony-Stimulating Factor; IFN, Interferon; IL, Interleukin; TNF, tumor necrosis factor.

**Supplementary Table S3.** Adipokine composition on maternal plasma (MP) and umbilical cord plasma (UCP) regarding the maternal enterotype.

| <b>MP</b>          | <b>Enterotype I, n = 10</b><br>(ng/mL) | <b>Enterotype II, n = 9</b><br>(ng/mL) |
|--------------------|----------------------------------------|----------------------------------------|
| <b>Leptin</b>      | 21.94 ± 6.71                           | 31.40 ± 7.90                           |
| <b>Adiponectin</b> | 11047.38 ± 1138.75                     | 15605.91 ± 1461.99 *                   |
| <b>Ratio L/A</b>   | 2.00E-03 ± 5.81E-04                    | 2.38E-03 ± 8.39E-04                    |

  

| <b>UCP</b>         | <b>Enterotype I, n = 11</b><br>(ng/mL) | <b>Enterotype II, n = 11</b><br>(ng/mL) |
|--------------------|----------------------------------------|-----------------------------------------|
| <b>Leptin</b>      | 9.40 ± 1.66                            | 6.88 ± 1.59                             |
| <b>Adiponectin</b> | 26124.67 ± 3656.35                     | 34568.60 ± 5153.06                      |
| <b>Ratio L/A</b>   | 4.49E-04 ± 1.09E-04                    | 2.14E-04 ± 4.11E-05                     |

Data shown are adipokine concentrations (ng/mL) expressed as mean ± S.E.M. Mann-Whitney U tests were used to determine significant differences between plasma samples. \* $p < 0.05$ . L/A ratio, leptin/adiponectin ratio.

Supplementary Figure S1

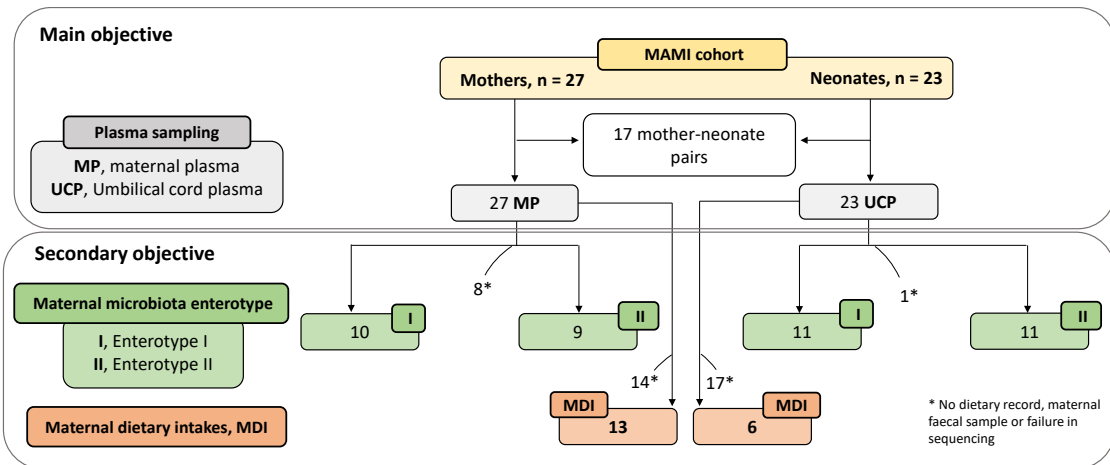

Supplementary Figure S1. Flow chart of the participants and samples available in this study.

**Supplementary Figure S2.**

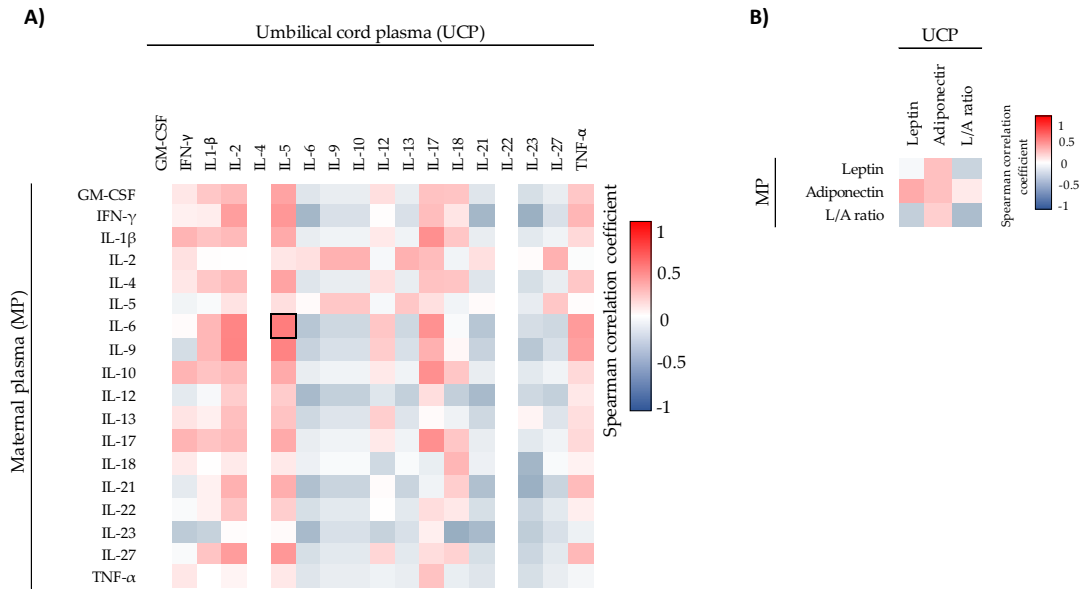

**Supplementary figure S2.** Correlations between the CK (A) and adipokine (B) concentrations present in maternal plasma (MP) and umbilical cord plasma (UCP) (n = 16). The Spearman correlation coefficient is represented in the heat map following the color in the legend. Bold frames represent correlations with statistical significance ( $p < 0.05$ ). GM-CSF, Granulocyte Macrophage Colony-Stimulating Factor; IFN, Interferon; IL, Interleukin; L/A ratio, Leptin/Adiponectin ratio; TNF, tumour necrosis factor.

**Supplementary Figure S3.**

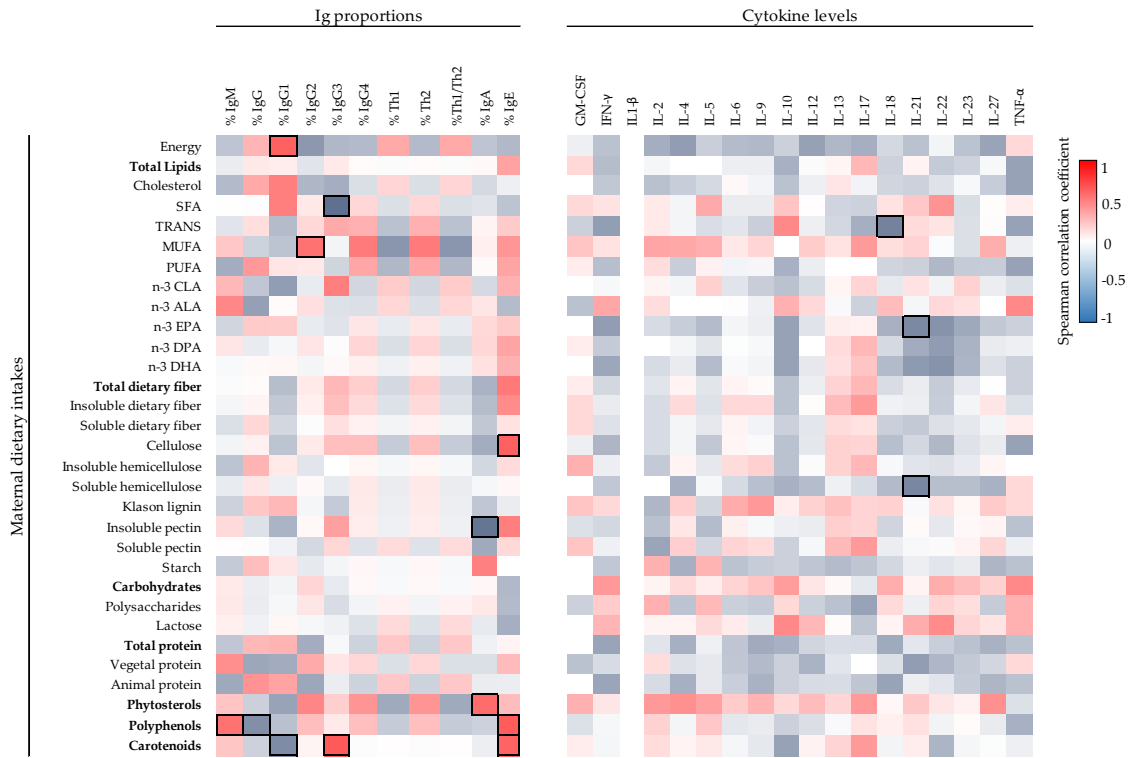

**Supplementary Figure S3.** Correlations between Ig proportions and CK levels of MP ( $n = 13$ ) with the maternal dietary intakes. The Spearman correlation coefficient is represented in the heat map following the color in the legend. Bold frames represent correlations with statistical significance ( $p < 0.05$ ). L/A ratio, Leptin/Adiponectin ratio. IgG1, IgG2 and IgG3 (Igs associated to Th1 response); IgG4 (Ig associated to Th2 response).
